# Supplementary material
Source: PubMed Central journal article supplement (PMC5365351)
Supplement: NIHMS851813-supplement-Supplemental_Data_File__doc__pdf__etc___1.pdf [file NIHMS851813-supplement-Supplemental_Data_File__doc__pdf__etc___1.pdf]

Please complete the following **Clinical evaluation of Cervical Imaging** after using your standard of care and transvaginal digital colposcope (TVDC) /for VIA/VIAM for cervical cancer screening.

|                                                                                                                                                                                                                                  | Response                                                                                                                                                                                              |
|----------------------------------------------------------------------------------------------------------------------------------------------------------------------------------------------------------------------------------|-------------------------------------------------------------------------------------------------------------------------------------------------------------------------------------------------------|
| <b>Reviewer ID #: ( Please Select from List)</b>                                                                                                                                                                                 |                                                                                                                                                                                                       |
| <b>Site Affiliation: ( Please Select from List)</b>                                                                                                                                                                              |                                                                                                                                                                                                       |
| <b>Image Letter Code: ( Please Select from List)</b>                                                                                                                                                                             | A    B    C    D    E    F                                                                                                                                                                            |
| <b>Image ID #: ( Please Select from List)</b>                                                                                                                                                                                    |                                                                                                                                                                                                       |
| What is the standard of care cervical imaging of your practice?                                                                                                                                                                  | <input type="checkbox"/> VIA (naked eye)<br><input type="checkbox"/> VIAM with Cervicography<br><input type="checkbox"/> VIAM with Colposcopy                                                         |
| Field of view -<br>How many of the four quadrants of the cervix can you see in a single view?                                                                                                                                    | <input type="checkbox"/> 1 <input type="checkbox"/> 2 <input type="checkbox"/> 3 <input type="checkbox"/> 4                                                                                           |
| Magnification -<br>Does a single image/visual provide adequate magnification?                                                                                                                                                    | <input type="checkbox"/> yes <input type="checkbox"/> no                                                                                                                                              |
| Is the image/visual in focus?                                                                                                                                                                                                    | <input type="checkbox"/> yes <input type="checkbox"/> no                                                                                                                                              |
| Can you see the os?                                                                                                                                                                                                              | <input type="checkbox"/> yes <input type="checkbox"/> no                                                                                                                                              |
| If present, can you see the transformation zone?                                                                                                                                                                                 | <input type="checkbox"/> yes <input type="checkbox"/> no <input type="checkbox"/> NA                                                                                                                  |
| Can you see aceto-whitening?                                                                                                                                                                                                     | <input type="checkbox"/> yes <input type="checkbox"/> no    NA                                                                                                                                        |
| If there are aceto-whitened sites, what is the opacity?                                                                                                                                                                          | <input type="checkbox"/> transparent                      NA<br><input type="checkbox"/> semi-opaque<br><input type="checkbox"/> fully opaque                                                         |
| If there are aceto-whitened sites, what is the color?                                                                                                                                                                            | <input type="checkbox"/> pure white                      NA<br><input type="checkbox"/> grey white<br><input type="checkbox"/> oyster grey                                                            |
| Surface shine - is the cervical surface shiny?                                                                                                                                                                                   | <input type="checkbox"/> intense shiny                      NA<br><input type="checkbox"/> shiny<br><input type="checkbox"/> dull                                                                     |
| Lesion margin - describe the lesion margin                                                                                                                                                                                       | <input type="checkbox"/> Flat/indistinct/feathered/scalloped<br><input type="checkbox"/> Smooth                      NA<br><input type="checkbox"/> Rolled/peeled                                     |
| Vascularization - describe, if present                                                                                                                                                                                           | <input type="checkbox"/> yes vessels, fine punctuation/mosaicism<br><input type="checkbox"/> no vessels                      NA<br><input type="checkbox"/> yes vessels, coarse punctuation/mosaicism |
| How many lesions are visible?                                                                                                                                                                                                    | Fill in blank ( ___ )                                                                                                                                                                                 |
| Please check the location of lesion(s) on the shown clock face. The cervix, viewed as a circle, is divided into 12 segments denoted by 1-12 and separated into four quadrants denoted by dashed blue line for spatial reference. | <div style="text-align: center;"> <p><b>Lesion(s)</b></p> </div>                                                                                                                                      |
| What is your grading of this cervix?                                                                                                                                                                                             | <input type="checkbox"/> Normal <input type="checkbox"/> CIN0 <input type="checkbox"/> CIN1 <input type="checkbox"/> CIN2 <input type="checkbox"/> CIN3    Cancer                                     |
| Did the image provide enough information to make a confident diagnosis?<br>If not, why?                                                                                                                                          | <input type="checkbox"/> yes <input type="checkbox"/> no<br>Why? _____                                                                                                                                |

Click to Submit
