# Supplementary material
Source: PubMed Central journal article supplement (PMC5365351)
Supplement: NIHMS851813-supplement-Supplemental_Data_File__doc__pdf__etc___2.pdf [file NIHMS851813-supplement-Supplemental_Data_File__doc__pdf__etc___2.pdf]

**Supplemental Digital Content 2.** Definitions of features asked in clinical evaluation survey

| <b>Feature</b>             | <b>Definition</b>                                                                                                                                                                    |
|----------------------------|--------------------------------------------------------------------------------------------------------------------------------------------------------------------------------------|
| <b>Os</b>                  | The os (ostium of uterus), the external orifice of the uterus, when viewed through the vaginal canal, is a small rounded opening near the center of the cervix                       |
| <b>Transformation zone</b> | The transformation zone is an area of changing cells and the most common place on the cervix for abnormal cells to develop                                                           |
| <b>Acetowhitening</b>      | Acetowhitening refers to the color change when 3-5% solution of acetic acid (vinegar) is applied to the cervix, highlighting areas of increased cellular protein and nuclear density |
| <b>Opacity</b>             | Refers to the opacity of any acetowhitening                                                                                                                                          |
| <b>Color</b>               | Refers to the color of any acetowhitening                                                                                                                                            |
| <b>Surface shine</b>       | Refers to the shine of the cervix                                                                                                                                                    |
| <b>Lesion margin</b>       | Lesion margin refers to shape definition of any abnormal areas highlighted by acetowhitening                                                                                         |
| <b>Vascularization</b>     | Vascularization refers to the characteristic and size of any visible vessels                                                                                                         |
| <b>Visible lesions</b>     | Refers to the number of distinct areas of abnormal areas highlighted by acetowhitening                                                                                               |
| <b>Diagnosis</b>           | Refers to the ultimate grading of any potential precancerous cervical lesions from physicians review of each image                                                                   |
