# Supplementary material
Source: PubMed Central journal article supplement (PMC5365351)
Supplement: NIHMS851813-supplement-Supplemental_Data_File__doc__pdf__etc___3.pdf [file NIHMS851813-supplement-Supplemental_Data_File__doc__pdf__etc___3.pdf]

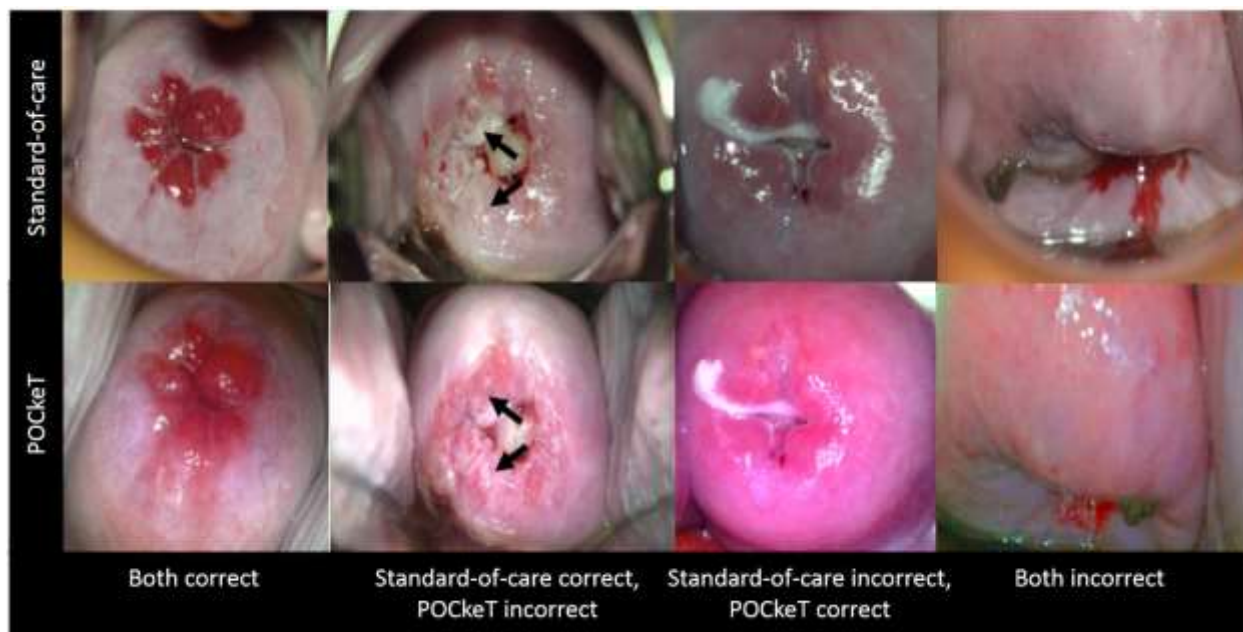

**Supplemental Digital Content 3.** Representative HSIL image pairs from the first protocol that were correctly and incorrectly diagnosed. Representative image pairs captured with the standard-of-care colposcope (ABCD) and POCkeT colposcope (EFGH) for the various scenarios in which standard-of-care colposcopy and/or POCkeT colposcopy paired images had correct and/or incorrect diagnosis when compared to pathology. Arrows indicate location of biopsy and images without arrows were treated with LEEP and HSIL tissue was found in every quadrant.
